# Supplementary material for: Oestrogens Downregulate Tissue Factor Pathway Inhibitor through Oestrogen Response Elements in the 5’-Flanking Region
Source: PubMed Central journal article supplement (PMC4801176; doi:10.1371/journal.pone.0152114), 2016-03-21
Supplement: pone.0152114.s001.pdf [file pone.0152114.s001.pdf]

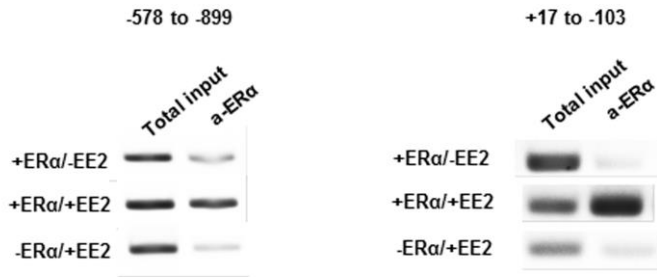

**S1 Fig. Recruitment of ER $\alpha$  to the TFPI 5'-flanking region in HEK293 cells.** ChIP assays using anti-ER $\alpha$  antibody were performed on chromatin isolated from HEK293 cells transfected with  $\pm$  ER $\alpha$  cDNA and cultured in phenol red-free medium in the absence or presence of 10 nM EE2 for 4 hours. The equivalent fraction of the sonicated chromatin was set aside as 'input' DNA (non-immunoprecipitated) before the antibody affinity manipulations. The immunoprecipitated DNA and input were analyzed by conventional PCR with primers covering the ERE half-sites. One representative result from two independent experiments is shown.
